# Supplementary material for: Coordination polymers of tetrazole-yl acylamide with octahedrally coordinated divalent transition metals: the effects of metal centers and side-groups on the structural topologies and symmetries
Source: Royal Society of Chemistry journal article supplement (doi:10.1039/c3ce27100e), 2013-01-01
Supplement: c3ce27100e.pdf [file c3ce27100e.pdf]

# Coordination Polymers of Tetrazole-yl Acylamide with Octahedrally Coordinated Divalent Transition Metal: the effects of metal-centers and side-groups on the structural topologies and symmetries

*Jian-Zhen Liao, Hua Ke, Jian-Jun Liu, Zuo-Yin Li, Mei-Jin Lin, Jun-Dong Wang, Chang-Cang Huang\**

College of Chemistry and Chemical Engineering, Fuzhou University, Fuzhou, Fujian, 350108, P.  
R. China

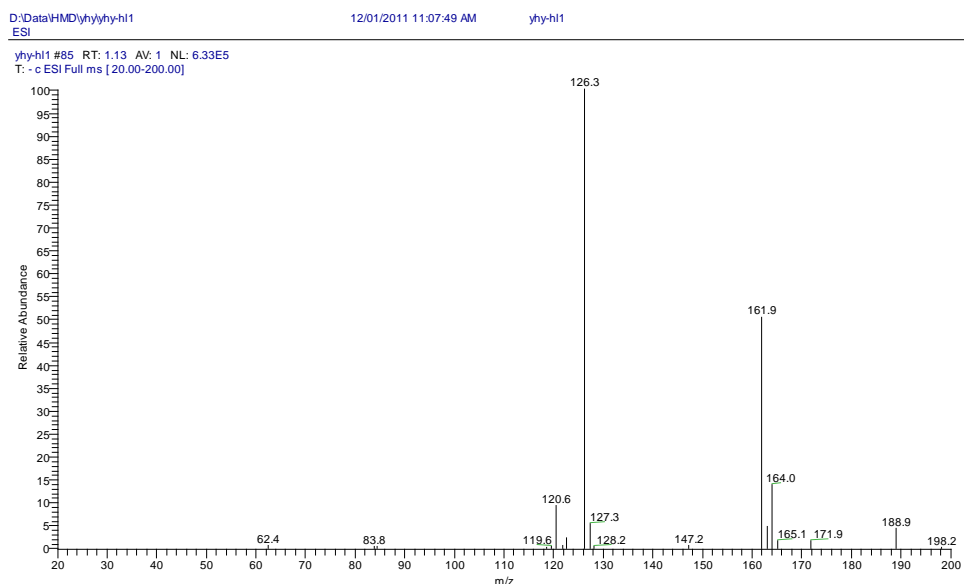

**Figure S1.** The MS of the H-NTAA.

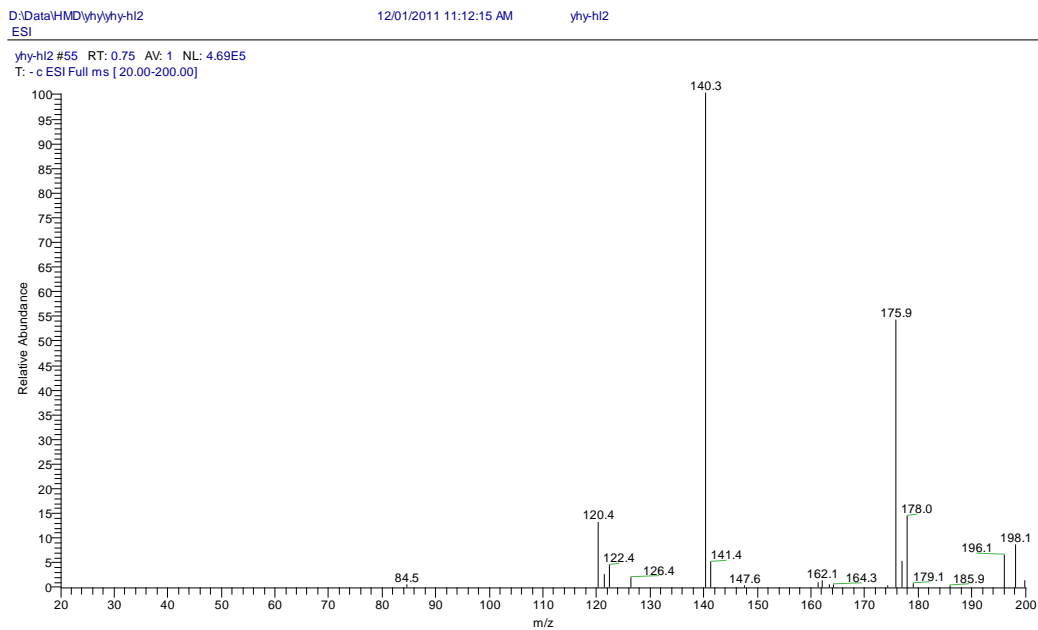

**Figure S2.** The MS of the H-NTPA.

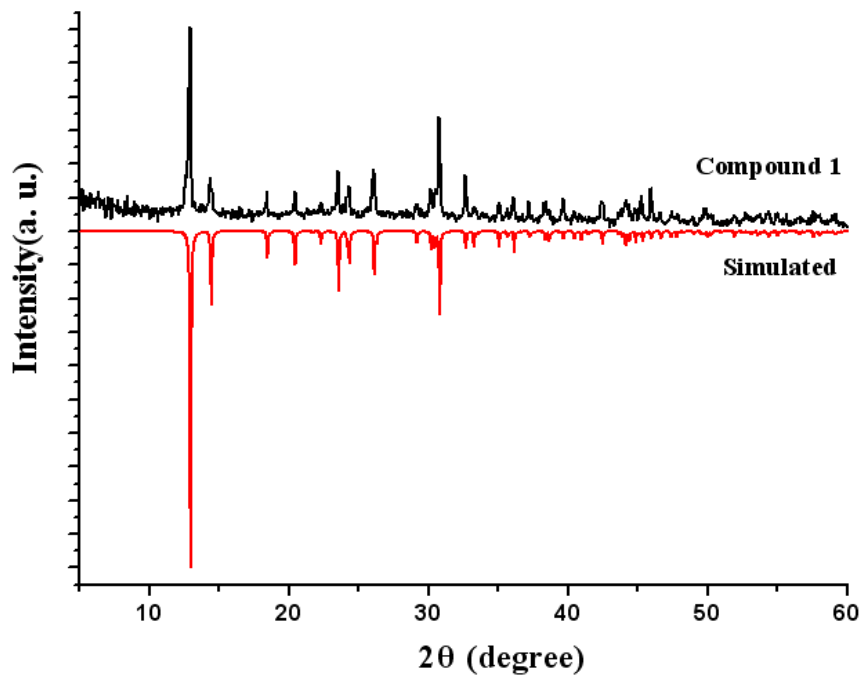

**Figure S3.** XRD patterns of **1** and the simulated pattern based on the single crystal **1**.

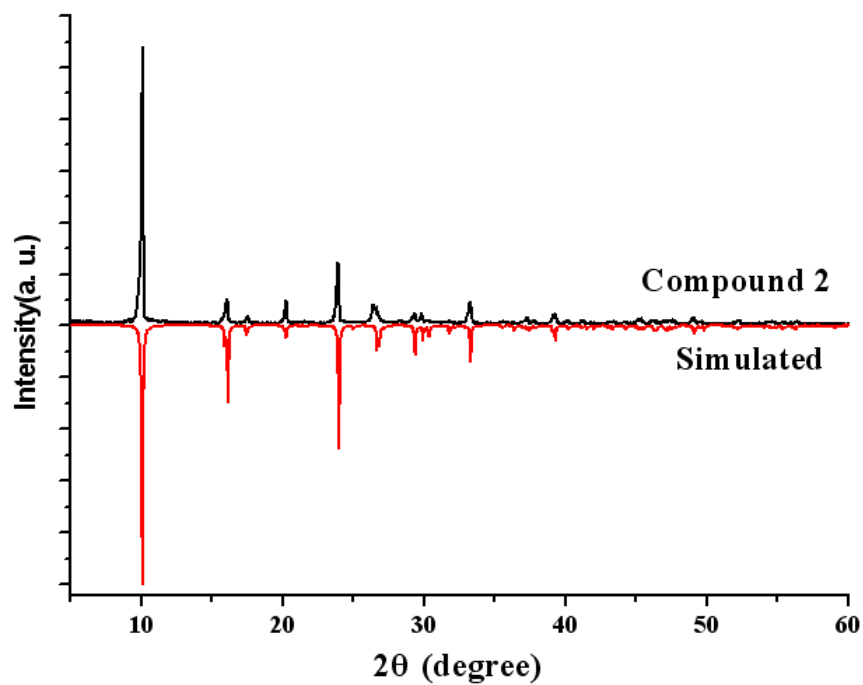

**Figure S4.** XRD patterns of **2** and the simulated pattern based on the single crystal **2**.

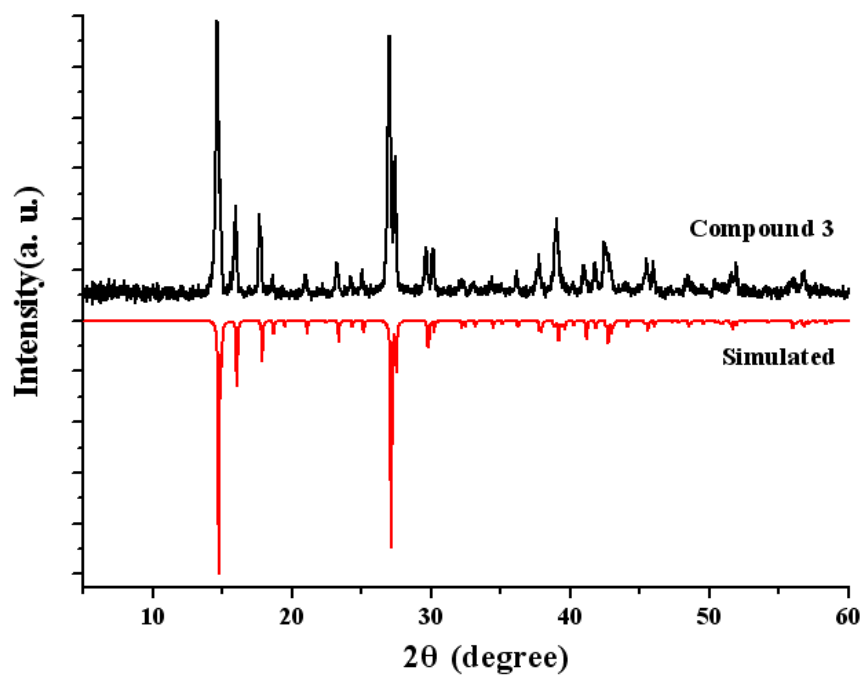

**Figure S5.** XRD patterns of **3** and the simulated pattern based on the single crystal **3**.

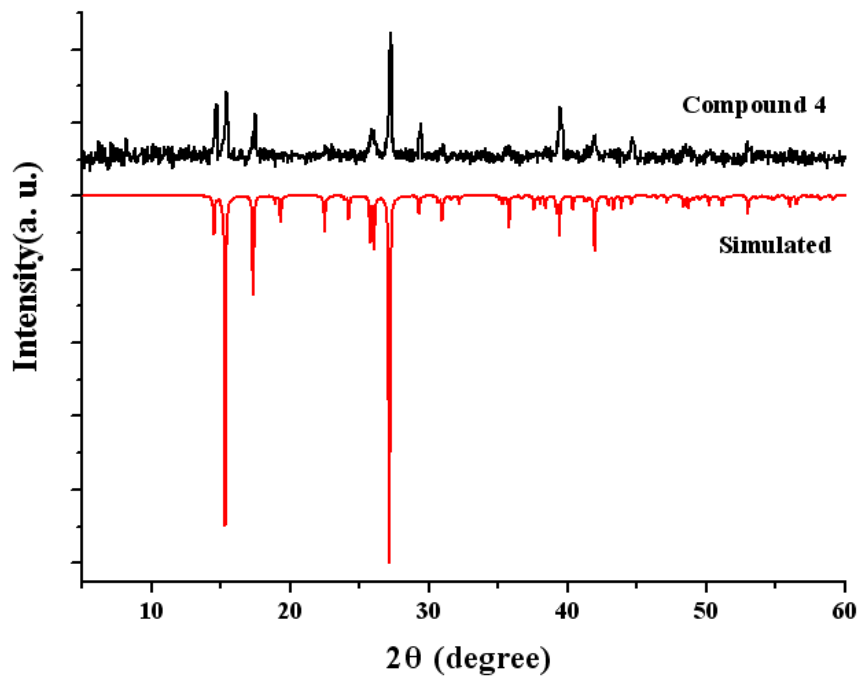

**Figure S6.** XRD patterns of **4** and the simulated pattern based on the single crystal **4**.

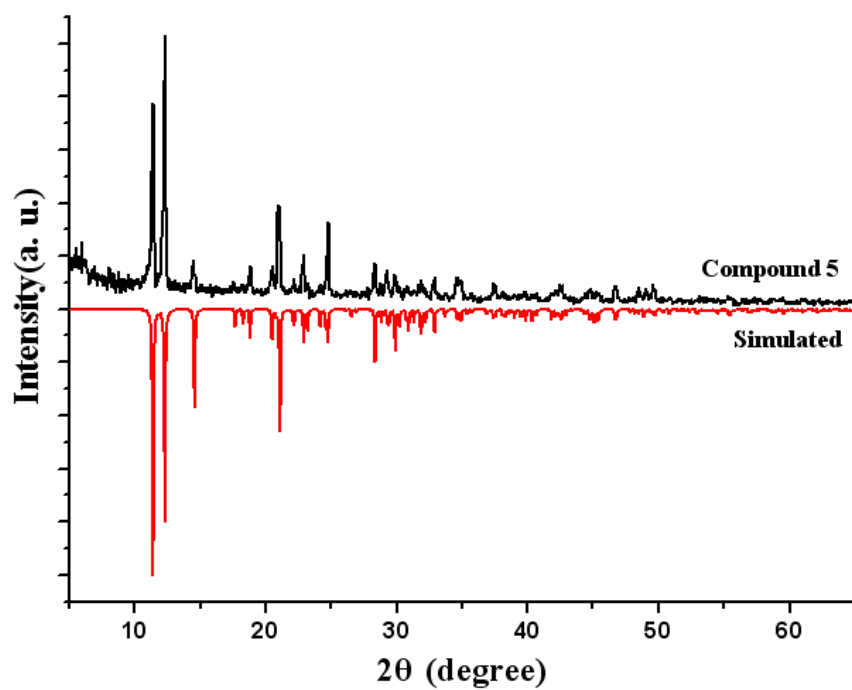

**Figure S7.** XRD patterns of **5** and the simulated pattern based on the single crystal **5**.

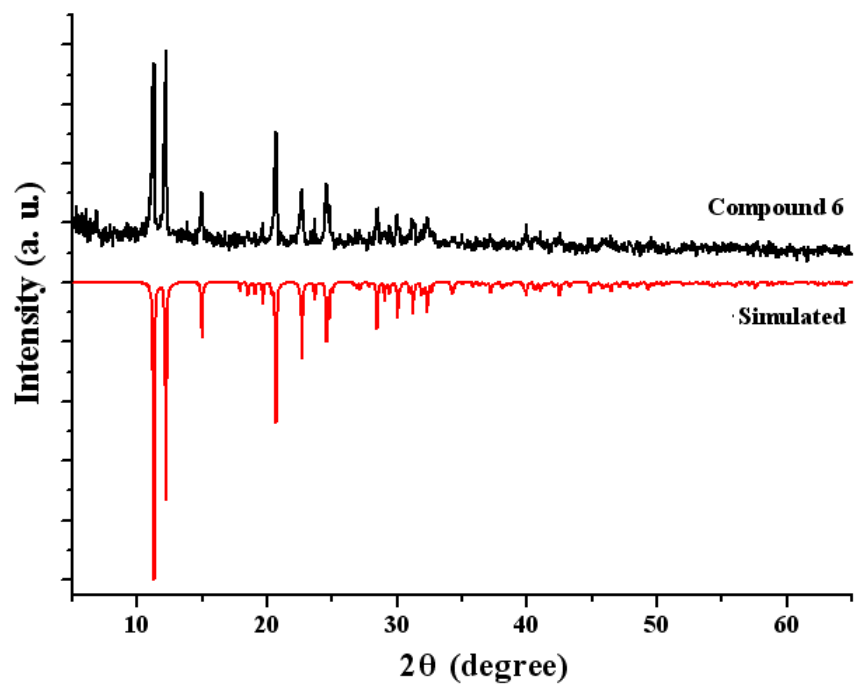

**Figure S8.** XRD patterns of **6** and the simulated pattern based on the single crystal **6**.

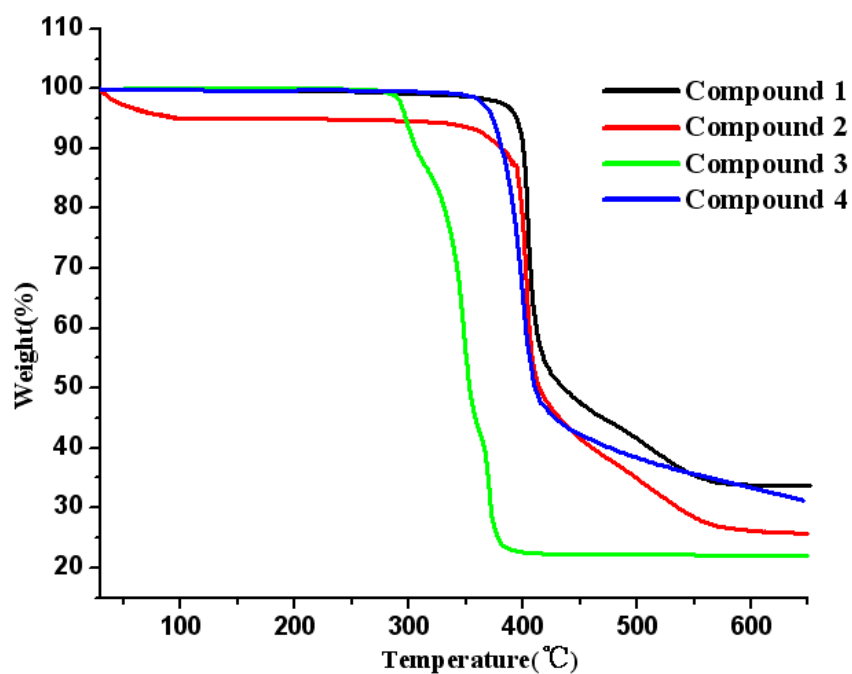

**Figure S9.** TGA diagrams of compounds **1-4**.

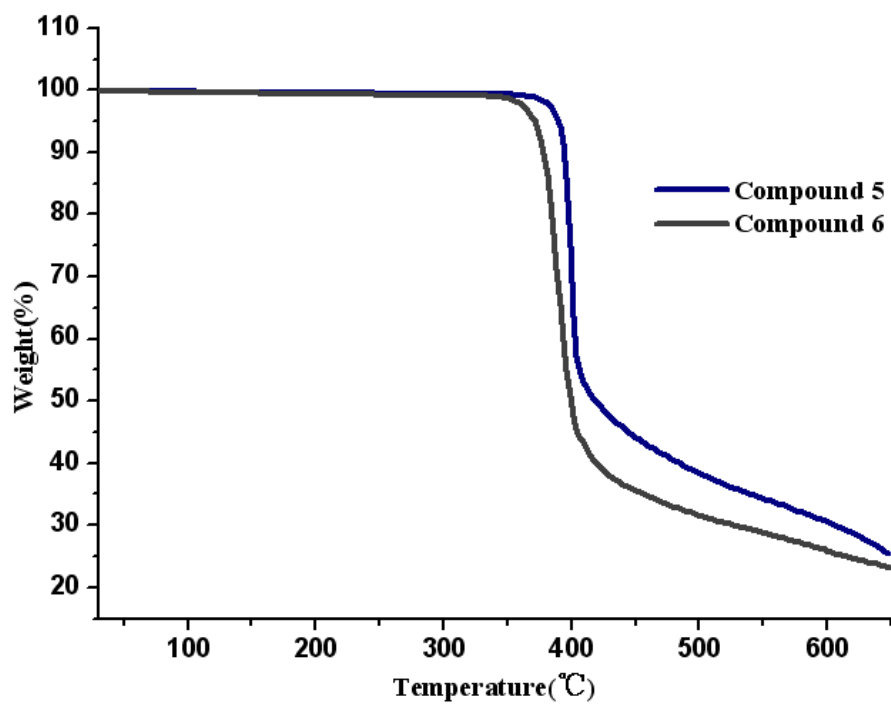

**Figure S10.** TGA diagrams of compounds 5-6.

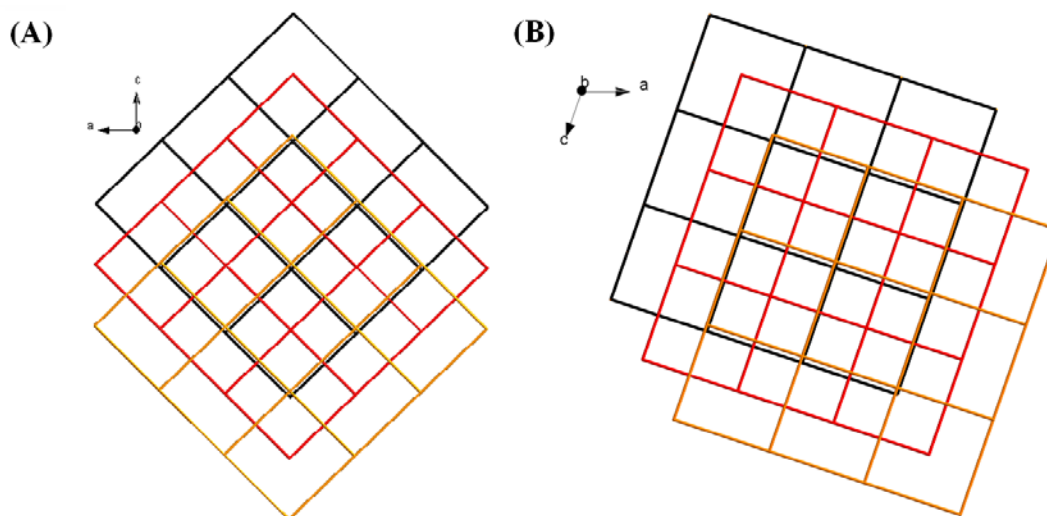

**Figure S11.** Schematic Representation of the Difference between the *Aba2*(a) and *Cc*(b) nets.

**Table S1.** Selected bond lengths (Å) and angles (°) for compounds **1-6**.<sup>#</sup>

| Compound 1                           |              |                                      |             |
|--------------------------------------|--------------|--------------------------------------|-------------|
| Cd1—N1a                              | 2.239 (2)    | Cd1—N4c                              | 2.330 (3)   |
| Cd1—N1                               | 2.239 (2)    | Cd1—O1a                              | 2.403 (2)   |
| Cd1—N4b                              | 2.330 (3)    | Cd1—O1                               | 2.403 (2)   |
| N1a—Cd1—N1                           | 162.57 (115) | N1a—Cd1—O1                           | 92.54 (9)   |
| N1a—Cd1—N4b                          | 93.10 (9)    | N1—Cd1—O1                            | 75.33 (8)   |
| N1—Cd1—N4b                           | 97.02 (9)    | N4b—Cd1—O1                           | 169.12 (10) |
| N1a—Cd1—N4c                          | 97.02 (9)    | N4c—Cd1—O1                           | 79.67 (10)  |
| N1—Cd1—N4c                           | 93.10 (9)    | N1a—Cd1—O1a                          | 75.33 (8)   |
| N4b—Cd1—N4c                          | 108.83 (14)  | N1—Cd1—O1a                           | 92.54 (9)   |
| N4b—Cd1—O1a                          | 79.67 (10)   | O1a—Cd1—O1                           | 92.78 (14)  |
| N4c—Cd1—O1a                          | 169.12 (10)  |                                      |             |
| Compound 2                           |              |                                      |             |
| Zn1—N1                               | 2.0718 (17)  | Zn1—N2 <sup>c</sup>                  | 2.1497 (17) |
| Zn1—N2 <sup>a</sup>                  | 2.1497 (17)  | Zn1—O1 <sup>b</sup>                  | 2.1856 (15) |
| Zn1—N1 <sup>b</sup>                  | 2.0718 (17)  | Zn1—O1                               | 2.1853 (16) |
| N1—Zn1—N1 <sup>b</sup>               | 165.76 (9)   | N2 <sup>c</sup> —Zn1—O1 <sup>b</sup> | 174.89 (6)  |
| N1—Zn1—N2 <sup>c</sup>               | 89.21 (6)    | N2 <sup>a</sup> —Zn1—O1 <sup>b</sup> | 89.13 (7)   |
| N1 <sup>b</sup> —Zn1—N2 <sup>c</sup> | 100.45 (6)   | N1—Zn1—O1                            | 82.80 (6)   |
| N1—Zn1—N2 <sup>a</sup>               | 100.45 (6)   | N1 <sup>b</sup> —Zn1—O1              | 86.89 (6)   |
| N1 <sup>b</sup> —Zn1—N2 <sup>a</sup> | 89.21 (6)    | N2 <sup>c</sup> —Zn1—O1              | 89.13 (7)   |
| N2 <sup>c</sup> —Zn1—N2 <sup>a</sup> | 94.83 (10)   | N2 <sup>a</sup> —Zn1—O1              | 174.89 (6)  |
| N1—Zn1—O1 <sup>b</sup>               | 86.89 (6)    | O1 <sup>b</sup> —Zn1—O1              | 87.10 (9)   |
| N1 <sup>b</sup> —Zn1—O1 <sup>b</sup> | 82.80 (6)    |                                      |             |
| Compound 3                           |              |                                      |             |

|                                       |             |                                       |             |
|---------------------------------------|-------------|---------------------------------------|-------------|
| Cu1—N2                                | 1.954 (2)   | Cu1—O1 <sup>b</sup>                   | 1.9873 (19) |
| Cu1—N4 <sup>a</sup>                   | 2.583 (7)   | Cu1—O1                                | 1.9873 (19) |
| Cu1—N2 <sup>b</sup>                   | 1.954 (2)   | Cu1—N4 <sup>c</sup>                   | 2.583 (7)   |
| N2—Cu1—N2 <sup>b</sup>                | 180.000 (1) | N2—Cu1—O1                             | 87.99 (8)   |
| N2—Cu1—O1 <sup>b</sup>                | 92.01 (8)   | N2 <sup>b</sup> —Cu1—O1               | 92.01 (8)   |
| N2 <sup>b</sup> —Cu1—O1 <sup>b</sup>  | 87.99 (8)   | O1 <sup>b</sup> —Cu1—O1               | 180.0       |
| N4 <sup>a</sup> —Cu1—N4 <sup>c</sup>  | 180.0       |                                       |             |
| <b>Compound 4</b>                     |             |                                       |             |
| Mn1—O1 <sup>a</sup>                   | 2.136 (5)   | Mn1—N3 <sup>c</sup>                   | 2.264 (8)   |
| Mn1—O1 <sup>b</sup>                   | 2.136 (5)   | Mn1—N5 <sup>a</sup>                   | 2.259(8)    |
| Mn1—N3                                | 2.264 (8)   | Mn1—N5 <sup>b</sup>                   | 2.259 (8)   |
| O1 <sup>a</sup> —Mn1—O1 <sup>b</sup>  | 179.9 (8)   | N3—Mn1—N5 <sup>a</sup>                | 177.5 (4)   |
| O1 <sup>a</sup> —Mn1—N3               | 94.6 (4)    | N3 <sup>c</sup> —Mn1—N5 <sup>a</sup>  | 87.95 (17)  |
| O1 <sup>b</sup> —Mn1—N3               | 85.5 (4)    | O1 <sup>a</sup> —Mn1—N5 <sup>b</sup>  | 96.1 (4)    |
| O1 <sup>a</sup> —Mn1—N3 <sup>c</sup>  | 85.5 (4)    | O1 <sup>b</sup> —Mn1—N5 <sup>b</sup>  | 83.8 (4)    |
| O1 <sup>b</sup> —Mn1—N3 <sup>c</sup>  | 94.6 (4)    | N3—Mn1—N5 <sup>b</sup>                | 87.95 (17)  |
| N3—Mn1—N3 <sup>c</sup>                | 93.9 (4)    | N3 <sup>c</sup> —Mn1—N5 <sup>b</sup>  | 177.5 (4)   |
| O1 <sup>a</sup> —Mn1—N5 <sup>a</sup>  | 83.8 (4)    | N5 <sup>a</sup> —Mn1—N5 <sup>b</sup>  | 90.2(4)     |
| O1 <sup>b</sup> —Mn1—N5 <sup>a</sup>  | 96.1 (4)    |                                       |             |
| <b>Compound 5</b>                     |             |                                       |             |
| Cd1—N10 <sup>a</sup>                  | 2.250 (3)   | Cd1—N7                                | 2.341 (3)   |
| Cd1—N2                                | 2.254 (3)   | Cd1—O1                                | 2.388 (3)   |
| Cd1—N5 <sup>b</sup>                   | 2.308 (3)   | Cd1—O2 <sup>a</sup>                   | 2.414 (3)   |
| N10 <sup>a</sup> —Cd1—N2              | 158.52 (13) | N5 <sup>b</sup> —Cd1—O1               | 82.67 (12)  |
| N10 <sup>a</sup> —Cd1—N5 <sup>b</sup> | 98.11 (12)  | N7—Cd1—O1                             | 169.70 (12) |
| N2—Cd1—N5 <sup>b</sup>                | 96.81 (12)  | N10 <sup>a</sup> —Cd1—O2 <sup>a</sup> | 74.63 (11)  |
| N10 <sup>a</sup> —Cd1—N7              | 92.68 (12)  | N2—Cd1—O2 <sup>a</sup>                | 89.01 (12)  |



|                          |             |                                      |             |
|--------------------------|-------------|--------------------------------------|-------------|
| N2—Cd1—N7                | 97.86 (12)  | N5 <sup>b</sup> —Cd1—O2 <sup>a</sup> | 171.33 (12) |
| N5 <sup>b</sup> —Cd1—N7  | 106.36 (13) | N7—Cd1—O2 <sup>a</sup>               | 79.07 (13)  |
| N10 <sup>a</sup> —Cd1—O1 | 90.89 (11)  | O1—Cd1—O2 <sup>a</sup>               | 92.59 (13)  |
| N2—Cd1—O1                | 75.77 (11)  |                                      |             |
| <b>Compound 6</b>        |             |                                      |             |
| Mn1—N1                   | 2.199 (6)   | Mn1—O2                               | 2.238 (6)   |
| Mn1—N6                   | 2.218 (6)   | Mn1—N4 <sup>a</sup>                  | 2.245 (6)   |
| Mn1—O1                   | 2.227 (5)   | Mn1—N9 <sup>b</sup>                  | 2.274 (6)   |
| N1—Mn1—N6                | 162.3 (2)   | O1—Mn1—N4 <sup>a</sup>               | 84.8 (2)    |
| N1—Mn1—O1                | 78.4 (2)    | O2—Mn1—N4 <sup>a</sup>               | 174.0 (2)   |
| N6—Mn1—O1                | 91.7 (2)    | N1—Mn1—N9 <sup>b</sup>               | 96.5 (2)    |
| N1—Mn1—O2                | 88.0 (2)    | N6—Mn1—N9 <sup>b</sup>               | 92.0 (2)    |
| N6—Mn1—O2                | 77.8 (2)    | O1—Mn1—N9 <sup>b</sup>               | 172.9 (2)   |
| O1—Mn1—O2                | 93.0 (3)    | O2—Mn1—N9 <sup>b</sup>               | 81.8 (3)    |
| N1—Mn1—N4 <sup>a</sup>   | 97.0 (2)    | N4 <sup>a</sup> —Mn1—N9 <sup>b</sup> | 101.0 (2)   |
| N6—Mn1—N4 <sup>a</sup>   | 96.7 (2)    |                                      |             |

<sup>#</sup>Symmetry Code: **1**) (a)  $-x+1/2, -y+3/2, z$ ; (b)  $-x+1/4, y-1/4, z-1/4$ ; (c)  $x+1/4, -y+7/4, z-1/4$ . **2**) (a)  $-x, -y+1, -z$ ; (b)  $-x, y, -z+1/2$ ; (c)  $x, -y+1, z+1/2$ . **3**) (a)  $x-1/2, -y+5/2, z-1/2$ ; (b)  $-x, 2-y, 1-z$ ; (c)  $-x+1/2, y-1/2, -z+1/2$ . **4**) (a)  $x-1/2, -y, z-1/2$ ; (b)  $-x+1/2, y, z-1/2$ ; (c)  $-x, -y, z$ . **5**) (a)  $x, -y+1, z-1/2$ ; (b)  $x-1/2, -y+1/2, z-1/2$ . **6**) (a)  $x+1/2, -y-1/2, z+1/2$ ; (b)  $x, -y-1, z-1/2$ .
